# Supplementary material
Source: PubMed Central journal article supplement (PMC7191997)
Supplement: NIHMS1517033-supplement-2.pdf [file NIHMS1517033-supplement-2.pdf]

**Table S1. List of primers used for RTqPCR of mouse genes** (related to the STAR Methods, RTqPCR analyses)

| <b>Gene</b>          | <b>Strand</b> | <b>Primer sequence</b> |
|----------------------|---------------|------------------------|
| <b><i>Tbp</i></b>    | Forward       | CCTTGTACCCTTCACCAATGAC |
|                      | Reverse       | ACAGCCAAGATTCACGGTAGA  |
| <b><i>Camp</i></b>   | Forward       | CAAGGAACAGGGGGTGG      |
|                      | Reverse       | TCCGGCTGAGGTACAAGTTT   |
| <b><i>Pref1</i></b>  | Forward       | TGGCTGGGACGGGAAATTC    |
|                      | Reverse       | CACGCAAGTTCCATTGTTGGC  |
| <b><i>Col1a1</i></b> | Forward       | GCTCCTCTTAGGGGCCACT    |
|                      | Reverse       | ATTGGGGACCCTTAGGCCAT   |
| <b><i>Thy1</i></b>   | Forward       | CCTTACCCTAGCCAACTTCAC  |
|                      | Reverse       | AGGATGTGTTCTGAACCAGC   |
| <b><i>Pdgfra</i></b> | Forward       | ATGAGAGTGAGATCGAAGGCA  |
|                      | Reverse       | CGGCAAGGTATGATGGCAGAG  |

|               |         |                           |
|---------------|---------|---------------------------|
| <b>Sca1</b>   | Forward | GAGGCAGCAGTTATTGTGGAT     |
|               | Reverse | CGTTGACCTTAGTACCCAGGA     |
| <b>Pparg1</b> | Forward | AAGAAGCGGTGAACCACTGA      |
|               | Reverse | GGAATGCGAGTGGTCTTCCA      |
| <b>Pparg2</b> | Forward | TCGCTGATGCACTGCCTATG      |
|               | Reverse | GAGAGGTCCACAGAGCTGATT     |
| <b>Adipoq</b> | Forward | CACACCAGGCCGTGATGGCA      |
|               | Reverse | GAAGCCCCGTGGCCCTTCAG      |
| <b>Fabp4</b>  | Forward | GTGGGAGTGGGCTTTGCCACA     |
|               | Reverse | CACCAGGGCCCCGCCATCTA      |
| <b>Vim</b>    | Forward | CGGCTGCGAGAGAAATTGC       |
|               | Reverse | CCACTTCCGTTCAAGGTCAAG     |
| <b>Acta2</b>  | Forward | GGCACCACTGAACCCTAAGG      |
|               | Reverse | ACAATACCAGTTGTACGTCCAGA   |
| <b>Spp1</b>   | Forward | TCTCCTTGCGCCACAGAATG      |
|               | Reverse | GGCTTTCATTGGAATTGCTTGG    |
| <b>Ctgf</b>   | Forward | GGGCCTCTTCTGCGATTTT       |
|               | Reverse | ATCCAGGCAAGTGCATTGGTA     |
| <b>Mmp13</b>  | Forward | CTATCCCTTGATGCCATTACCAG   |
|               | Reverse | ATCCACATGGTTGGGAAGTTC     |
| <b>Pai1</b>   | Forward | GATGACCACAGCGGGGAAAA      |
|               | Reverse | ACAAAGATGGCATCCGCAGT      |
| <b>Tgfbr2</b> | Forward | AACATGGAAGAGTGCAACGAT     |
|               | Reverse | CGTCACTTGGATAATGACCAACA   |
| <b>Dcn</b>    | Forward | GTCATCTTCGAGTGGTGCAGT     |
|               | Reverse | CAAGGTTGTGTCGGGTGGAAA     |
| <b>Tgfb1</b>  | Forward | GAGCCCGAAGCGGACTACTA      |
|               | Reverse | TGGTTTTCTCATAGATGGCGTTG   |
| <b>Tgfb2</b>  | Forward | CAGTGGGAAGACCCACATC       |
|               | Reverse | TGTAAAGAGGGCGAAGGCAG      |
| <b>Tgfb3</b>  | Forward | GA CTGGCGGAGCACAATGAA     |
|               | Reverse | CTGCCCGGAACAGATTGGT       |
| <b>Cd24a</b>  | Forward | TTCTGGCACTGCTCCTACC       |
|               | Reverse | GCGTTACTTGGATTTGGGGAA     |
| <b>Il6</b>    | Forward | ACAAAGCCAGAGTCCTTCAGAGAGA |
|               | Reverse | AGCCACTCCTTCTGTGACTCCAG   |

**Table S2. List of primers used for RTqPCR of human genes** (related to the STAR Methods, RTqPCR analyses)

|             |         |                         |
|-------------|---------|-------------------------|
| <b>HPRT</b> | Forward | CCTGGCGTCGTGATTAGTGAT   |
|             | Reverse | AGACGTTCAAGTCCTGTCCATAA |

|               |         |                         |
|---------------|---------|-------------------------|
| <b>COL1A1</b> | Forward | AAGAGGAAGGCCAAGTCGAG    |
|               | Reverse | CACACGTCTCGGTCATGGTA    |
| <b>CAMP</b>   | Forward | AGGTCCTCAGCTACAAGGAAG   |
|               | Reverse | TCTTGAAGTCACAATCCTCTGGT |
| <b>PPARG</b>  | Forward | TACTGTCGGTTTCAGAAATGCC  |
|               | Reverse | GTCAGCGGACTCTGGATTCAG   |
| <b>ADIPOQ</b> | Forward | AGGAAACCACGACTCAAGGG    |
|               | Reverse | TCCGGTTTCACCGATGTCTC    |
| <b>FABP4</b>  | Forward | ACTGGGCCAGGAATTTGACG    |
|               | Reverse | CTCGTGGAAGTGACGCCTT     |
| <b>ACTA2</b>  | Forward | CACCATCGGAAATGAACGTTT   |
|               | Reverse | GACTCCATCCCGATGAAGGA    |
| <b>CTGF</b>   | Forward | ACCCGGGTTACCAATGACAA    |
|               | Reverse | GTACGGATGCACTTTTTGCC    |
